# Supplementary material
Source: PubMed Central journal article supplement (PMC6644336)
Supplement: ao7b00616_si_001.pdf [file ao7b00616_si_001.pdf]

# **Sorption Behavior of Bisphenol A and Triclosan by Graphene:**

## **Comparison with Activated Carbon**

Fei Wang<sup>1,2,4</sup>, Xingwen Lu<sup>1,3</sup>, Wenchao Peng<sup>1,5</sup>, Yu Deng<sup>1</sup>, Tong Zhang<sup>1</sup>, Yibo Hu<sup>1</sup>, and Xiao-yan Li<sup>1\*</sup>

<sup>1</sup>Department of Civil Engineering, The University of Hong Kong, Pokfulam, Hong Kong

<sup>2</sup>School of Environment, Guangzhou Key Laboratory of Environmental Exposure and Health, and Guangdong Key Laboratory of Environmental Pollution and Health, Jinan University, Guangzhou 510632, China

<sup>3</sup>School of Environmental Science and Engineering, Guangdong University of Technology, Guangzhou 510006, China

<sup>4</sup>Guangdong Provincial Key Laboratory of Environmental Pollution Control and Remediation Technology, Guangzhou 510275, China

<sup>5</sup>School of Chemical Engineering and Technology, Tianjin University, Tianjin 300072, China.

### **Supporting Information**

Including 5 figures.

---

\*Corresponding Author. Tel: 852-28592659; Fax: 852-25595337; Email: [xlia@hkucc.hku.hk](mailto:xlia@hkucc.hku.hk)

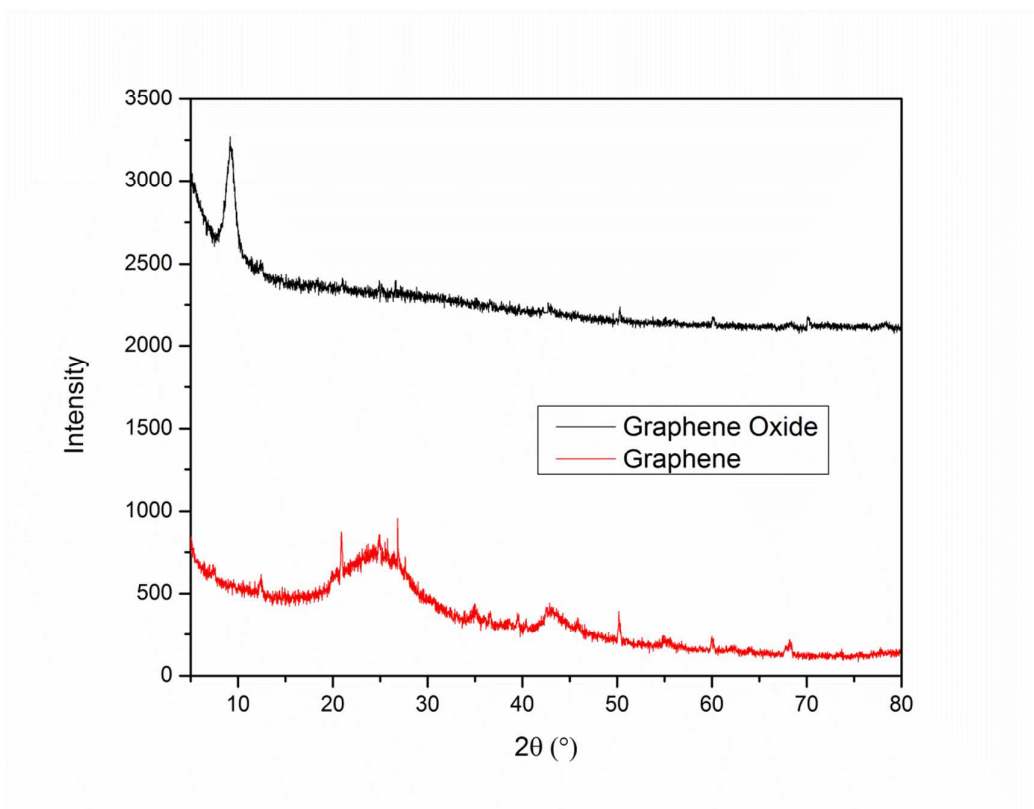

Figure S1. The XRD pattern of as-made graphene oxide (black line) and graphene (red line).

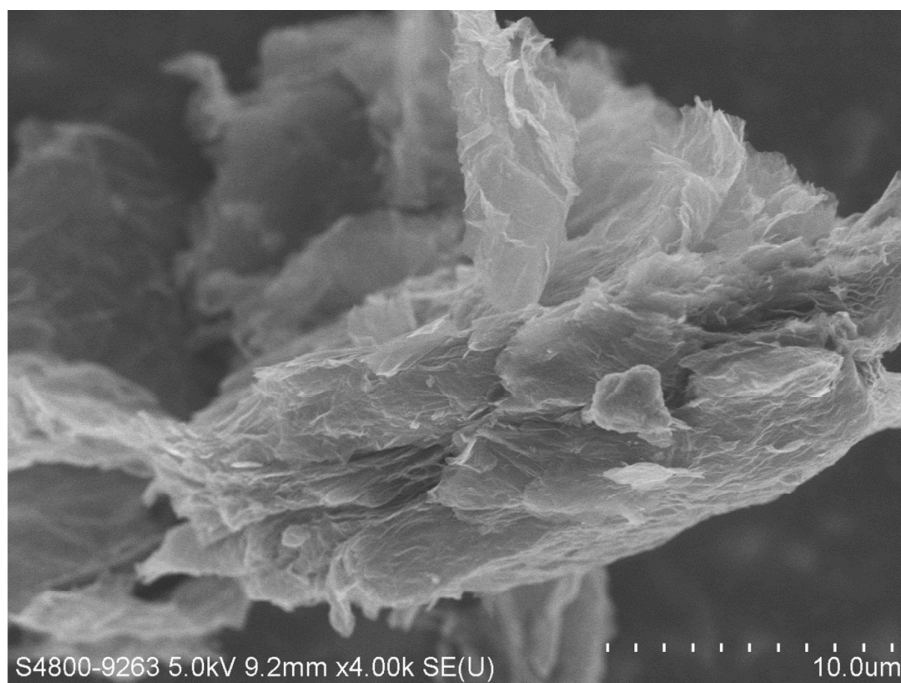

Figure S2. The micrograph of the as-made graphene observed by SEM.

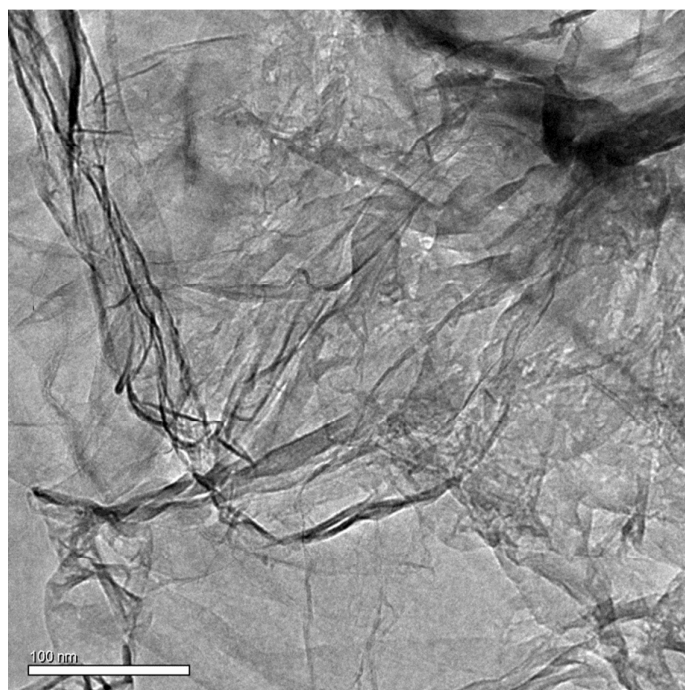

Figure S3. The TEM image of the as-made graphene used in this study.

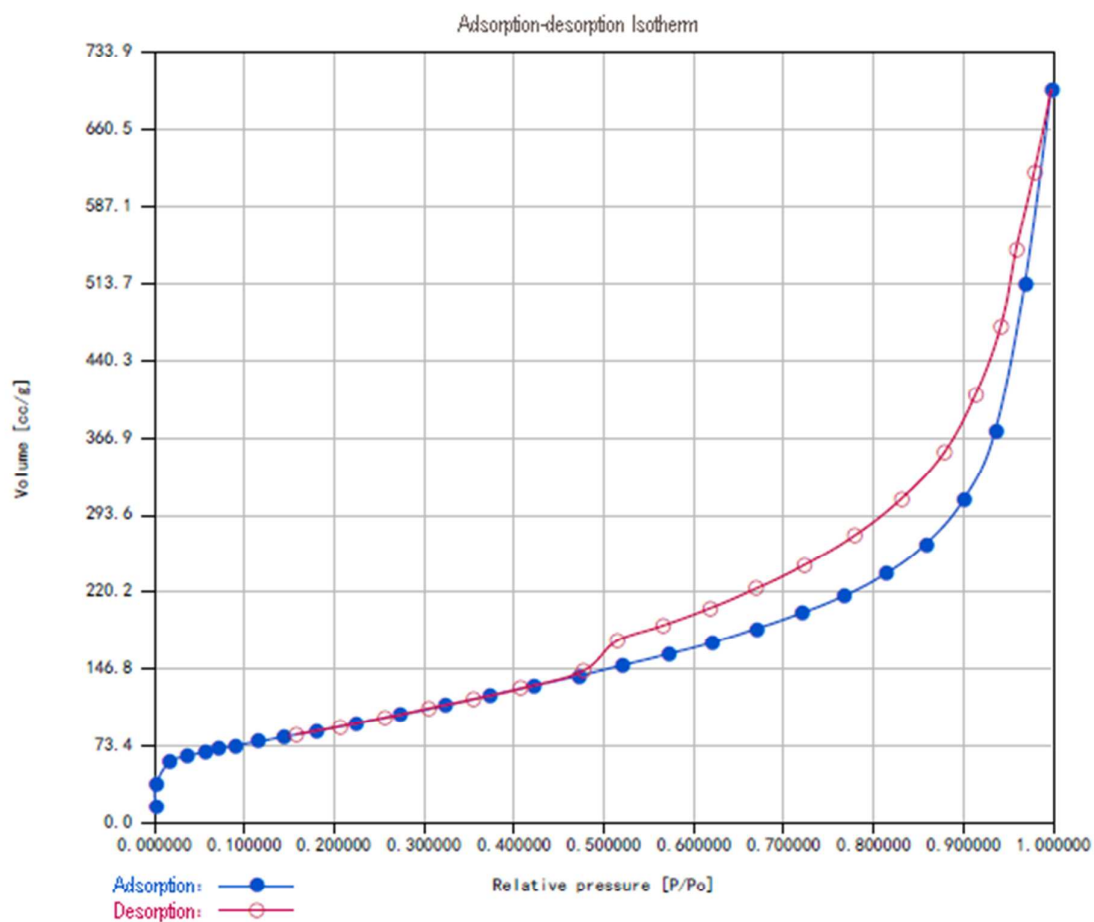

Figure S4. The adsorption-desorption isotherm of the as-made graphene used in this study.

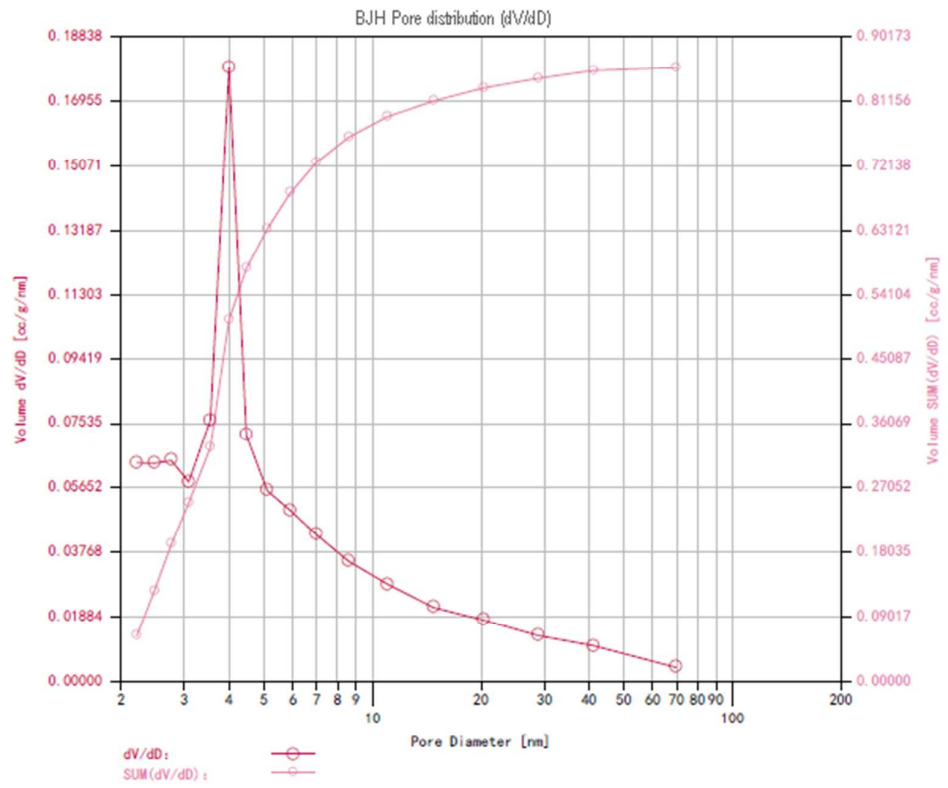

Figure S5. The BJH pore distribution of the as-made graphene used in this study.
